# Supplementary material for: Targeted Next Generation Sequencing for Human Papillomavirus Genotyping in Cervical Liquid-Based Cytology Samples
Source: MDPI journal article supplement (doi:10.3390/cancers14030652), 2022-01-27
Supplement: s1 [file s1]

## Supplementary tables

Table S1: HPV types detected in the NGS assay, Cobas® 4800, and CLART® HPV4S in general practitioner-collected cervical samples and cervico-vaginal self-samples of women with atypical squamous cells of undetermined significance (ASCUS).

|             | GP-collected cervical samples             |               |                | Cervico-vaginal self-samples                      |               |                                 |
|-------------|-------------------------------------------|---------------|----------------|---------------------------------------------------|---------------|---------------------------------|
| Patient no. | NGS assay                                 | Cobas® 4800   | CLART® HPV4S   | NGS assay                                         | Cobas® 4800   | CLART® HPV4S                    |
| 7           | HPVneg                                    | HPVneg        | HPVneg         | HPVneg                                            | HPVneg        | HPVneg                          |
| 8           | HPVneg                                    | HPVneg        | HPVneg         | HPV68                                             | HPVneg        | HPV68                           |
| 9           | HPVneg                                    | HPVneg        | HPV68          | HPV68                                             | HPVneg        | HPVneg                          |
| 10          | HPV16<br>HPV66                            | HPV16<br>HPVA | HPV16<br>HPV66 | HPV16<br>HPV66                                    | HPV16<br>HPVA | HPV66                           |
| 11          | HPVneg                                    | HPVneg        | HPVneg         | HPVneg                                            | HPVneg        | HPVneg                          |
| 12          | HPVneg                                    | HPVneg        | HPVneg         | HPVneg                                            | HPVneg        | HPVneg                          |
| 13          | HPV16<br>HPV30<br>HPV31<br>HPV66<br>HPV68 | HPV16<br>HPVA | HPV31<br>HPV66 | HPV6<br>HPV30<br>HPV31<br>HPV66<br>HPV67<br>HPV68 | HPV16<br>HPVA | HPV6<br>HPV31<br>HPV66<br>HPV68 |
| 16          | HPVneg                                    | HPVneg        | HPVneg         | HPVneg                                            | HPVneg        | HPVneg                          |
| 17          | HPVneg                                    | HPVneg        | HPVneg         | HPVneg                                            | HPVneg        | HPVneg                          |
| 18          | HPVneg                                    | HPVA          | HPVneg         | HPVneg                                            | HPVneg        | HPVneg                          |
| 19          | HPVneg                                    | HPVneg        | HPVneg         | HPVneg                                            | HPVneg        | HPVneg                          |
| 21          | HPV58<br>HPV67                            | HPVA          | HPV58          | HPV67                                             | HPVneg        | HPVneg                          |
| 23          | HPVneg                                    | HPVneg        | HPVneg         | HPV35                                             | HPVneg        | HPVneg                          |
| 26          | HPVneg                                    | HPVneg        | HPVneg         | HPV6                                              | HPVneg        | HPVneg                          |
| 27          | HPVneg                                    | HPVneg        | HPVneg         | HPVneg                                            | HPVneg        | HPVneg                          |
| 28          | HPV45<br>HPV73                            | HPVA          | HPV45          | HPVneg                                            | HPVA          | HPVneg                          |
| 29          | HPVneg                                    | HPVneg        | HPVneg         | HPVneg                                            | HPVneg        | HPVneg                          |
| 31          | HPV31<br>HPV33<br>HPV66                   | HPVA          | HPV33          | HPV33                                             | HPVA          | HPV33                           |
| 32          | HPVneg                                    | HPVneg        | HPVneg         | HPVneg                                            | HPVneg        | HPVneg                          |
| 34          | HPV39                                     | HPVA          | HPV39          | HPV39                                             | HPVA          | HPV39                           |
| 35          | HPV56                                     | HPVA          | HPV56          | HPVneg                                            | HPVA          | HPVneg                          |
| 37          | HPVneg                                    | HPVneg        | HPVneg         | HPVneg                                            | HPVA          | HPVneg                          |
| 38          | HPV39                                     | HPVA          | HPV39          | HPV35<br>HPV39<br>HPV68<br>HPV73                  | HPVA          | HPV35<br>HPV39<br>HPV68         |
| 39          | HPVneg                                    | HPVneg        | HPVneg         | HPVneg                                            | HPVneg        | HPVneg                          |

|           |                         |               |                |                                           |               |                |
|-----------|-------------------------|---------------|----------------|-------------------------------------------|---------------|----------------|
| <b>40</b> | HPV30<br>HPV68<br>HPV73 | HPVneg        | HPV68          | HPV68<br>HPV73                            | HPVneg        | HPV68          |
| <b>41</b> | HPV16<br>HPV66          | HPVneg        | HPVneg         | HPVneg                                    | HPVneg        | HPVneg         |
| <b>44</b> | HPV51<br>HPV82          | HPVA          | HPV51          | HPV6<br>HPV82                             | HPVA          | HPV6           |
| <b>45</b> | HPVneg                  | HPVneg        | HPVneg         | HPVneg                                    | HPVneg        | HPVneg         |
| <b>46</b> | HPV31<br>HPV39          | HPVA          | HPV31<br>HPV39 | HPV31<br>HPV33<br>HPV39                   | HPVA          | HPV31<br>HPV39 |
| <b>47</b> | HPV39                   | HPVA          | HPV39          | HPV39                                     | HPVA          | HPV39          |
| <b>49</b> | HPV52<br>HPV59<br>HPV69 | HPVA          | HPV59          | HPV45<br>HPV52<br>HPV59<br>HPV66<br>HPV69 | HPVA          | HPV51<br>HPV59 |
| <b>50</b> | HPV16<br>HPV45<br>HPV51 | HPV16<br>HPVA | HPV16<br>HPV51 | HPV45<br>HPV51<br>HPV67                   | HPV16<br>HPVA | HPV51          |
| <b>51</b> | HPVneg                  | HPVA          | HPVneg         | HPVneg                                    | HPVneg        | HPVneg         |
| <b>52</b> | HPV39<br>HPV82          | HPVA          | HPV39<br>HPV68 | HPV39<br>HPV82                            | HPVA          | HPV39<br>HPV68 |
| <b>55</b> | HPV39                   | HPVA          | HPV39          | HPV39                                     | HPV16<br>HPVA | HPV39          |
| <b>56</b> | HPVneg                  | HPVneg        | HPVneg         | HPVneg                                    | HPVneg        | HPVneg         |
| <b>57</b> | HPV18                   | HPV18         | HPVneg         | HPVneg                                    | HPVneg        | HPVneg         |
| <b>59</b> | HPV35                   | HPVA          | HPV35          | HPVneg                                    | HPVneg        | HPVneg         |
| <b>60</b> | HPVneg                  | HPVneg        | HPVneg         | HPVneg                                    | HPVneg        | HPVneg         |
| <b>61</b> | HPV6                    | HPVneg        | HPV6           | HPV6                                      | HPVneg        | HPV6           |
| <b>62</b> | HPVneg                  | HPVneg        | HPVneg         | HPVneg                                    | HPVneg        | HPVneg         |
| <b>64</b> | HPV53                   | HPVneg        | HPVneg         | HPVneg                                    | HPVneg        | HPVneg         |
| <b>65</b> | HPV31<br>HPV70          | HPVA          | HPV31          | HPV31                                     | HPVA          | HPV31          |
| <b>66</b> | HPVneg                  | HPVneg        | HPVneg         | HPVneg                                    | HPVneg        | HPVneg         |
| <b>67</b> | HPVneg                  | HPVneg        | HPVneg         | HPVneg                                    | HPVneg        | HPVneg         |
| <b>71</b> | HPVneg                  | HPVneg        | HPVneg         | HPVneg                                    | HPVneg        | HPVneg         |
| <b>72</b> | HPVneg                  | HPVneg        | HPVneg         | HPVneg                                    | HPVneg        | HPVneg         |
| <b>73</b> | HPVneg                  | HPVneg        | HPVneg         | HPVneg                                    | HPVneg        | HPVneg         |
| <b>76</b> | HPV16                   | HPV16<br>HPVA | HPV16<br>HPV51 | HPV16                                     | HPV16         | HPV16          |
| <b>80</b> | HPVneg                  | HPVneg        | HPVneg         | HPVneg                                    | HPVneg        | HPVneg         |
| <b>83</b> | HPV16<br>HPV70          | HPV16         | HPVneg         | HPV16<br>HPV70                            | HPV16         | HPV16          |

|            |                         |               |                                  |                                           |               |                                  |
|------------|-------------------------|---------------|----------------------------------|-------------------------------------------|---------------|----------------------------------|
| <b>84</b>  | HPV18<br>HPV35          | HPV18<br>HPVA | HPV18<br>HPV35                   | HPV18<br>HPV35                            | HPV18<br>HPVA | HPV18<br>HPV35                   |
| <b>87</b>  | HPV59                   | HPVA          | HPVneg                           | HPV59<br>HPV67                            | HPVA          | HPV59                            |
| <b>92</b>  | HPV67<br>HPV70          | HPVA          | HPVneg                           | HPV66<br>HPV67<br>HPV70                   | HPVA          | HPV66                            |
| <b>96</b>  | HPV18<br>HPV31          | HPV18         | HPV18                            | HPV18                                     | HPV18         | HPV18                            |
| <b>99</b>  | HPV39                   | HPVA          | HPV39                            | HPV39                                     | HPVA          | HPV39                            |
| <b>101</b> | HPVneg                  | HPVneg        | HPVneg                           | HPVneg                                    | HPVneg        | HPVneg                           |
| <b>104</b> | HPV16<br>HPV68          | HPV16         | HPV16<br>HPV68                   | HPV16<br>HPV68                            | HPV16         | HPV16<br>HPV68                   |
| <b>107</b> | HPV66<br>HPV70          | HPVA          | HPV66                            | HPV70                                     | HPVneg        | HPVneg                           |
| <b>123</b> | HPV59                   | HPV16<br>HPVA | HPVneg                           | HPV16                                     | HPV16<br>HPVA | HPV16<br>HPV59                   |
| <b>128</b> | HPVneg                  | HPVneg        | HPVneg                           | HPVneg                                    | HPVneg        | HPVneg                           |
| <b>130</b> | HPV53<br>HPV68          | HPVA          | HPV68                            | HPV53                                     | HPVneg        | HPVneg                           |
| <b>131</b> | HPVneg                  | HPVneg        | HPVneg                           | HPVneg                                    | HPVneg        | HPVneg                           |
| <b>135</b> | HPVneg                  | HPVneg        | HPVneg                           | HPVneg                                    | HPVA          | HPV51                            |
| <b>137</b> | HPVneg                  | HPVneg        | HPVneg                           | HPVneg                                    | HPVneg        | HPVneg                           |
| <b>138</b> | HPV16<br>HPV30<br>HPV53 | HPV16         | HPV16                            | HPV16<br>HPV30<br>HPV45<br>HPV53          | HPV16<br>HPVA | HPV16<br>HPV45                   |
| <b>139</b> | HPVneg                  | HPV18         | HPVneg                           | HPVneg                                    | HPV18<br>HPVA | HPV66                            |
| <b>144</b> | HPVneg                  | HPVneg        | HPVneg                           | HPVneg                                    | HPVneg        | HPVneg                           |
| <b>145</b> | HPVneg                  | HPVneg        | HPVneg                           | HPVneg                                    | HPVneg        | HPVneg                           |
| <b>147</b> | HPV16                   | HPV16         | HPV16                            | HPV16                                     | HPV16         | HPV16                            |
| <b>148</b> | HPV52<br>HPV59<br>HPV66 | HPVneg        | HPV51<br>HPV52<br>HPV59          | HPVneg                                    | HPVneg        | HPVneg                           |
| <b>149</b> | HPV16                   | HPVA          | HPVneg                           | HPVneg                                    | HPV18<br>HPVA | HPV35                            |
| <b>153</b> | HPV35<br>HPV70          | HPV18<br>HPVA | HPV35                            | HPV35<br>HPV70                            | HPVA          | HPV35                            |
| <b>156</b> | HPV31<br>HPV39<br>HPV51 | HPVA          | HPV31<br>HPV39<br>HPV51<br>HPV58 | HPV31<br>HPV39<br>HPV51<br>HPV58<br>HPV68 | HPVA          | HPV31<br>HPV39<br>HPV51<br>HPV58 |

|            |                |               |                |                         |               |                |
|------------|----------------|---------------|----------------|-------------------------|---------------|----------------|
| <b>163</b> | HPV52          | HPVA          | HPV52          | HPV6<br>HPV52           | HPVA          | HPV6<br>HPV52  |
| <b>165</b> | HPVneg         | HPVA          | HPVneg         | HPV45<br>HPV73          | HPV18<br>HPVA | HPVneg         |
| <b>168</b> | HPVneg         | HPV16<br>HPVA | HPVneg         | HPVneg                  | HPV16         | HPVneg         |
| <b>169</b> | HPVneg         | HPVneg        | HPVneg         | HPVneg                  | HPVneg        | HPVneg         |
| <b>179</b> | HPV35          | HPVA          | HPV35          | HPV35                   | HPVA          | HPV35          |
| <b>180</b> | HPVneg         | HPVneg        | HPVneg         | HPVneg                  | HPVneg        | HPVneg         |
| <b>184</b> | HPVneg         | HPVneg        | HPVneg         | HPVneg                  | HPVneg        | HPVneg         |
| <b>185</b> | HPVneg         | HPVA          | HPV68          | HPVneg                  | HPVneg        | HPVneg         |
| <b>189</b> | HPVneg         | HPVneg        | HPVneg         | HPV16<br>HPV35<br>HPV70 | HPV16<br>HPVA | HPV16<br>HPV35 |
| <b>190</b> | HPV31          | HPVneg        | HPV31          | HPVneg                  | HPVneg        | HPVneg         |
| <b>191</b> | HPVneg         | HPVneg        | HPVneg         | HPVneg                  | HPVneg        | HPVneg         |
| <b>192</b> | HPVneg         | HPVneg        | HPVneg         | HPVneg                  | HPVneg        | HPVneg         |
| <b>193</b> | HPVneg         | HPVneg        | HPVneg         | HPVneg                  | HPVneg        | HPVneg         |
| <b>195</b> | HPV52          | HPVA          | HPV52          | HPV52                   | HPVA          | HPV52          |
| <b>196</b> | HPV31          | HPVA          | HPV31          | HPV31<br>HPV33          | HPVA          | HPV31          |
| <b>202</b> | HPVneg         | HPVneg        | HPVneg         | HPVneg                  | HPVneg        | HPVneg         |
| <b>205</b> | HPV45<br>HPV52 | HPVA          | HPV45<br>HPV52 | HPV45<br>HPV52          | HPVA          | HPV45<br>HPV52 |
| <b>211</b> | HPV70          | HPV16         | HPVneg         | HPV30<br>HPV70          | HPVneg        | HPVneg         |
| <b>212</b> | HPV16          | HPV16<br>HPVA | HPV16<br>HPV45 | HPV16<br>HPV45          | HPV16<br>HPVA | HPV16<br>HPV45 |

HPVA: HPV31, 33, 35, 39, 45, 51, 52, 56, 58, 59, 66, or 68, HPVneg: HPV negative, GP: General practitioner.

Table S2: Genomic variants of HPVs detected by the NGS assay in general practitioner-collected cervical samples with atypical squamous cells of undetermined significance (ASCUS).

| HPV type | Genomic variant | Amino acid variant | Viral gene | Frequency, n (%) |
|----------|-----------------|--------------------|------------|------------------|
| 6        | c.221A>T        | p.Thr40Thr         | E6         | 1 (100.00)       |
|          | c.365A>T        | p.Thr88Thr         | E6         | 1 (100.00)       |
|          | c.392C>T        | p.Ile97Ile         | E6         | 1 (100.00)       |
|          | c.823C>A        | p.Thr98Thr         | E7         | 1 (100.00)       |
|          | c.3387T>C       | p.Leu222Pro        | E2         | 1 (100.00)       |
|          |                 | p.Leu27Leu         | E4         |                  |
|          | c.3404A>C       | p.Lys228Gln        | E2         | 1 (100.00)       |
|          |                 | p.Pro32Pro         | E4         |                  |
|          | c.3514C>G       | p.His264Gln        | E2         | 1 (100.00)       |
|          |                 | p.Thr69Arg         | E4         |                  |
|          | c.3518C>G       | p.Leu266Val        | E2         | 1 (100.00)       |
|          |                 | p.Thr70Thr         | E4         |                  |
|          | c.3540A>C       | p.Gln273Pro        | E2         | 1 (100.00)       |
|          |                 | p.Ser78Arg         | E4         |                  |
|          | c.3551C>A       | p.Arg277Arg        | E2         | 1 (100.00)       |
|          |                 | p.Asp81Glu         | E4         |                  |
|          | c.6721A>G       | p.Lys311Lys        | L1         | 1 (100.00)       |
| 16       | c.3365G>A       | p.Glu204Lys        | E2         | 2 (18.18)        |
|          |                 | p.Thr8Thr          | E4         |                  |
|          | c.3384T>C       | p.Ile210Thr        | E2         | 1 (9.09)         |
|          |                 | p.Leu15Leu         | E4         |                  |
|          | c.3410C>T       | p.Pro219Ser        | E2         | 7 (63.64)        |
|          |                 | p.Thr23Thr         | E4         |                  |
| 18       | c.3485G>A       | p.Glu244Lys        | E2         | 1 (9.09)         |
|          |                 | p.Gln48Gln         | E4         |                  |
|          | c.6568T>G       | p.Pro310Pro        | L1         | 1 (9.09)         |
|          |                 |                    |            |                  |
|          | c.751C>T        | p.Ala54Ala         | E7         | 3 (100.00)       |
| 30       | c.3630C>G       | p.Pro272Ala        | E2         | 2 (66.67)        |
|          |                 | p.His71Gln         | E4         |                  |
|          | c.400T>C        | p.Phe100Ser        | E6         | 2 (66.67)        |
|          | c.433A>T        | p.Gln111Leu        | E6         | 1 (33.33)        |
|          | c.800C>T        | p.Pro79Ser         | E7         | 3 (100.00)       |
|          | c.808G>A        | p.Lys81Lys         | E7         | 3 (100.00)       |
|          | c.3464T>C       | p.Pro246Pro        | E2         | 3 (100.00)       |
|          |                 | p.Leu51Pro         | E4         |                  |
|          | c.3549A>T       | p.Thr275Ser        | E2         | 1 (33.33)        |
|          |                 | p.Thr79Thr         | E4         |                  |
|          | c.3602C>T       | p.Asp292Asp        | E2         | 3 (100.00)       |
|          |                 | p.Thr97Met         | E4         |                  |
|          | c.3614A>G       | p.Lys296Lys        | E2         | 3 (100.00)       |
|          |                 | p.Lys101Arg        | E4         |                  |

|           |                    |                          |    |            |
|-----------|--------------------|--------------------------|----|------------|
|           | c.6605A>G          | p.Gly325Gly              | L1 | 1 (33.33)  |
|           | c.6620T>A          | p.Ile330Ile              | L1 | 2 (66.67)  |
| <b>31</b> | c.248T>C           | p.Phe47Phe               | E6 | 3 (37.50)  |
|           | c.404G>A           | p.Leu99Leu               | E6 | 3 (37.50)  |
|           | c.428A>G           | p.Gln107Gln              | E6 | 3 (37.50)  |
|           | c.580G>A           | p.Thr7Thr                | E7 | 3 (37.50)  |
|           | c.626C>T           | p.His23Tyr               | E7 | 5 (62.50)  |
|           | c.743A>G           | p.Lys62Glu               | E7 | 8 (100.00) |
|           | c.3517C>T          | p.Ile275Ile              | E2 | 1 (12.50)  |
|           |                    | p.Ser80Leu               | E4 |            |
| <b>33</b> | c.213A>C           | p.Lys35Asn               | E6 | 1 (100.00) |
|           | c.2877G>T          | p.Leu43Phe               | E2 | 1 (100.00) |
|           | c.3401A>C          | p.Asn218Thr              | E2 | 1 (100.00) |
|           |                    | p.Thr23Pro               | E4 |            |
| <b>35</b> | c.3465A>G          | p.Tyr250Cys              | E2 | 4 (100.00) |
|           |                    | p.Thr55Ala               | E4 |            |
| <b>39</b> | c.3485T>C          | p.Ser230Pro              | E2 | 2 (25.00)  |
|           |                    | p.Ile28Ile               | E4 |            |
|           | c.3567C>G          | p.Pro257Arg              | E2 | 1 (12.50)  |
|           |                    | p.Pro56Ala               | E4 |            |
|           | c.3621A>C          | p.Asn275Thr              | E2 | 1 (12.50)  |
|           |                    | p.Thr74Pro               | E4 |            |
|           | c.3623_3625del     | p.Ser276del              | E2 | 1 (12.50)  |
|           |                    | p.Val75del               | E4 |            |
|           | c.3631_3634delinsT | p.Gly278_His279delinsGly | E2 | 1 (12.50)  |
|           |                    | p.Ala77_Thr78delinsVal   | E4 |            |
|           | c.3636A>C          | p.Asn280Thr              | E2 | 1 (12.50)  |
|           |                    | p.Thr79Pro               | E4 |            |
|           | c.3640A>C          | p.Thr281Thr              | E2 | 2 (25.00)  |
|           |                    | p.Gln80Pro               | E4 |            |
|           | c.6569T>G          | p.Pro309Pro              | L1 | 1 (12.50)  |
|           | c.6638T>A          | p.Val332Val              | L1 | 6 (75.00)  |
| <b>45</b> | c.808G>T           | p.Glu74Asp               | E7 | 2 (66.67)  |
|           | c.2898T>G          | p.Leu44Val               | E2 | 2 (66.67)  |
|           | c.2899T>G          | p.Leu44Trp               | E2 | 1 (33.33)  |
|           | c.3510A>G          | p.Thr248Ala              | E2 | 2 (66.67)  |
|           |                    | p.Leu45Leu               | E4 |            |
|           | c.3521T>C          | p.Pro251Pro              | E2 | 2 (66.67)  |
|           |                    | p.Leu49Pro               | E4 |            |
|           | c.6615A>G          | p.Val362Val              | L1 | 1 (33.33)  |
| <b>51</b> | c.2874G>A          | p.Arg52Gln               | E2 | 2 (66.67)  |
| <b>52</b> | c.375G>T           | p.Val92Leu               | E6 | 1 (20.00)  |
|           | c.404T>C           | p.Ile101Ile              | E6 | 1 (20.00)  |

|    |                    |                           |          |            |
|----|--------------------|---------------------------|----------|------------|
|    | c.3409G>T          | p.Val223Leu<br>p.Gln27His | E2<br>E4 | 2 (40.00)  |
|    | c.3542G>A          | p.Arg267Gln<br>p.Gly72Arg | E2<br>E4 | 1 (20.00)  |
| 53 | c.224G>A           | p.Leu41Leu                | E6       | 1 (33.33)  |
|    | c.230G>T           | p.Ala43Ala                | E6       | 1 (33.33)  |
|    | c.261C>T           | p.Leu54Leu                | E6       | 1 (33.33)  |
|    | c.412C>T           | p.Ser104Leu               | E6       | 1 (33.33)  |
|    | c.803T>C           | p.Ser79Pro                | E7       | 1 (33.33)  |
|    | c.3434T>A          | p.Tyr231Asn<br>p.Pro35Pro | E2<br>E4 | 1 (33.33)  |
|    | c.3471C>T          | p.Pro243Leu<br>p.Pro48Ser | E2<br>E4 | 1 (33.33)  |
|    | c.3542G>C          | p.Glu267Gln<br>p.Gln71His | E2<br>E4 | 2 (66.67)  |
|    | c.3565C>T          | p.Asp274Asp<br>p.Thr79Ile | E2<br>E4 | 1 (33.33)  |
|    | c.6602G>A          | p.Gln315Gln               | L1       | 1 (33.33)  |
| 56 | c.141A>C           | p.Ser14Arg                | E6       | 1 (100.00) |
|    | c.802G>C           | p.Gln77His                | E7       | 1 (100.00) |
|    | c.3383G>C          | p.Val213Leu<br>p.Leu17Leu | E2<br>E4 | 1 (100.00) |
|    | c.3499T>C          | p.Phe251Phe<br>p.Leu56Ser | E2<br>E4 | 1 (100.00) |
|    | c.3545C>A          | p.His267Asn<br>p.His71Gln | E2<br>E4 | 1 (100.00) |
| 58 | c.2935A>C          | p.Ser61Ser                | E2       | 1 (100.00) |
|    | c.6641G>A          | p.Val333Val               | L1       | 1 (100.00) |
| 59 | c.213T>C           | p.Phe53Phe                | E6       | 1 (25.00)  |
|    | c.402T>C           | p.Asp116Asp               | E6       | 3 (75.00)  |
|    | c.595A>C           | p.Gln18His                | E7       | 3 (75.00)  |
|    | c.600A>T           | p.Tyr20Phe                | E7       | 3 (75.00)  |
|    | c.754T>C           | p.Asn71Asn                | E7       | 1 (25.00)  |
|    | c.3313A>T          | p.Tyr193Phe               | E2       | 1 (25.00)  |
|    | c.3378G>T          | p.Ala215Ser<br>p.Leu14Leu | E2<br>E4 | 4 (100.00) |
| 66 | c.539G>C           | p.Thr146Thr               | E6       | 2 (33.33)  |
|    | c.551T>C           | p.Ala150Ala               | E6       | 6 (100.00) |
|    | c.602G>A           | p.Val111Ile               | E7       | 6 (100.00) |
|    | c.628G>T           | p.Thr19Thr                | E7       | 6 (100.00) |
|    | c.779_781delinsCTT | p.Leu70Leu                | E7       | 6 (100.00) |
|    | c.817G>A           | p.Glu82Glu                | E7       | 1 (16.67)  |
|    | c.3411T>C          | p.Phe228Ser<br>p.Leu33Leu | E2<br>E4 | 3 (50.00)  |

|           |                    |                           |          |            |
|-----------|--------------------|---------------------------|----------|------------|
|           | c.3433G>A          | p.Ala235Ala<br>p.Arg40Gln | E2<br>E4 | 1 (16.67)  |
|           | c.3557C>G          | p.Pro277Ala<br>p.Val81Val | E2<br>E4 | 4 (66.67)  |
|           | c.3574A>C          | p.Gln282His<br>p.Lys87Thr | E2<br>E4 | 4 (66.67)  |
|           | c.3576G>A          | p.Ser283Asn<br>p.Ala88Thr | E2<br>E4 | 4 (66.67)  |
|           | c.3592A>G          | p.Lys288Lys<br>p.Lys93Arg | E2<br>E4 | 4 (66.67)  |
|           | c.3598G>A          | p.Thr290Thr<br>p.Arg95His | E2<br>E4 | 4 (66.67)  |
|           | c.3607C>T          | p.Ile293Ile               | E2       | 4 (66.67)  |
| <b>67</b> | c.252_254delinsCAC | p.Lys51His                | E6       | 1 (50.00)  |
|           | c.405C>A           | p.Arg102Arg               | E6       | 2 (100.00) |
|           | c.648A>T           | p.His29Leu                | E7       | 1 (50.00)  |
|           | c.775T>C           | p.Ile71Ile                | E7       | 1 (50.00)  |
|           | c.2865C>A          | p.Leu49Met                | E2       | 2 (100.00) |
|           | c.2879G>A          | p.Arg53Arg                | E2       | 1 (50.00)  |
|           | c.6611T>C          | p.Val332Val               | L1       | 1 (50.00)  |
| <b>68</b> | c.148A>G           | p.Ser50Gly                | E6       | 1 (25.00)  |
|           | c.154C>T           | p.Leu52Leu                | E6       | 1 (25.00)  |
|           | c.157_158delinsAA  | p.Cys53Asn                | E6       | 1 (25.00)  |
|           | c.536A>G           | p.Tyr18Cys                | E7       | 1 (25.00)  |
|           | c.547C>G           | p.Gln22Glu                | E7       | 1 (25.00)  |
|           | c.2866G>T          | p.Pro60Pro                | E2       | 1 (25.00)  |
|           | c.2902T>C          | p.Ala72Ala                | E2       | 1 (25.00)  |
|           | c.2930C>A          | p.Leu82Ile                | E2       | 1 (25.00)  |
|           | c.2936A>C          | p.Lys84Gln                | E2       | 1 (25.00)  |
|           | c.6483C>T          | p.Thr332Thr               | L1       | 1 (25.00)  |
| <b>69</b> | c.677G>T           | p.Glu38Asp                | E7       | 1 (100.00) |
|           | c.793T>G           | p.Leu77Arg                | E7       | 1 (100.00) |
| <b>70</b> | c.404A>G           | p.Asn100Asp               | E6       | 6 (100.00) |
|           | c.3503G>A          | p.Ala231Thr<br>p.Pro29Pro | E2<br>E4 | 1 (16.67)  |
|           | c.3516C>T          | p.Pro235Leu<br>p.His34Tyr | E2<br>E4 | 1 (16.67)  |
|           | c.3568A>G          | p.Arg252Arg<br>p.Asp51Gly | E2<br>E4 | 1 (16.67)  |
| <b>73</b> | c.203C>T           | p.Cys34Cys                | E6       | 1 (50.00)  |
|           | c.372_374delinsCAA | p.Asn91Gln                | E6       | 1 (50.00)  |
|           | c.394G>A           | p.Cys98Tyr                | E6       | 1 (50.00)  |
|           | c.396A>G           | p.Asn99Asp                | E6       | 1 (50.00)  |
|           | c.641A>G           | p.Asn31Ser                | E7       | 1 (50.00)  |
|           | c.789G>T           | p.Glu80Asp                | E7       | 2 (100.00) |



|           |                |                            |          |            |
|-----------|----------------|----------------------------|----------|------------|
|           | c.3412C>T      | p.Thr224Thr<br>p.Pro27Lleu | E2<br>E4 | 2 (100.00) |
|           | c.3470T>C      | p.Ser244Pro<br>p.Thr46Thr  | E2<br>E4 | 2 (100.00) |
|           | c.3490_3492del | p.Cys251del<br>p.Val54del  | E2<br>E4 | 1 (50.00)  |
| <b>82</b> | c.744C>G       | p.His60Gln                 | E7       | 2 (100.00) |
|           | c.810T>G       | p.Phe82Leu                 | E7       | 1 (50.00)  |
|           | c.2937A>C      | p.Val64Val                 | E2       | 1 (50.00)  |
|           | c.3315T>C      | p.Asn190Asn                | E2       | 1 (50.00)  |
|           | c.3356C>A      | p.Thr204Asn<br>p.Pro9Thr   | E2<br>E4 | 2 (100.00) |
|           | c.3553G>T      | p.Gly270Cys<br>p.Gln74His  | E2<br>E4 | 2 (100.00) |
|           | c.3564C>T      | p.Thr273Thr<br>p.Pro78Leu  | E2<br>E4 | 2 (100.00) |
|           | c.6560A>G      | p.Ile331Val                | L1       | 1 (50.00)  |
|           | c.6582A>G      | p.Lys338Arg                | L1       | 2 (100.00) |
